# Supplementary material for: The black swans of nuclear repositories – an overview of external events with a potentially serious impact on the long-term operation and safety
Source: Copernicus journal article supplement (doi:10.5194/sand-2-201-2023), 2023-09-06
Supplement: Supplementary file 1 [file sand-2-201-2023-supplement.pdf]

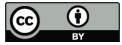

*Supplement of*

**The black swans of nuclear repositories – an overview of external events with a potentially serious impact on the long-term operation and safety**

**Sven Hagemann**

*Correspondence to:* Sven Hagemann (sven.hagemann@grs.de)

The copyright of individual parts of the supplement might differ from the article licence.

# The black swans of nuclear repositories – an overview of external events with a potentially serious impact on the long-term operation and safety

Sven Hagemann<sup>1</sup>

## BLACK SWANS IN NUCLEAR REPOSITORIES?

- In risk analysis, a black swan describes an unexpected event of large magnitude and consequences
- Events that do not specifically affect the site are typically not considered in the concept design of repositories
- However, a look at history teaches us about serious risks that should not be neglected

## A LOOK FORWARD AND BACK IN GERMAN HISTORY

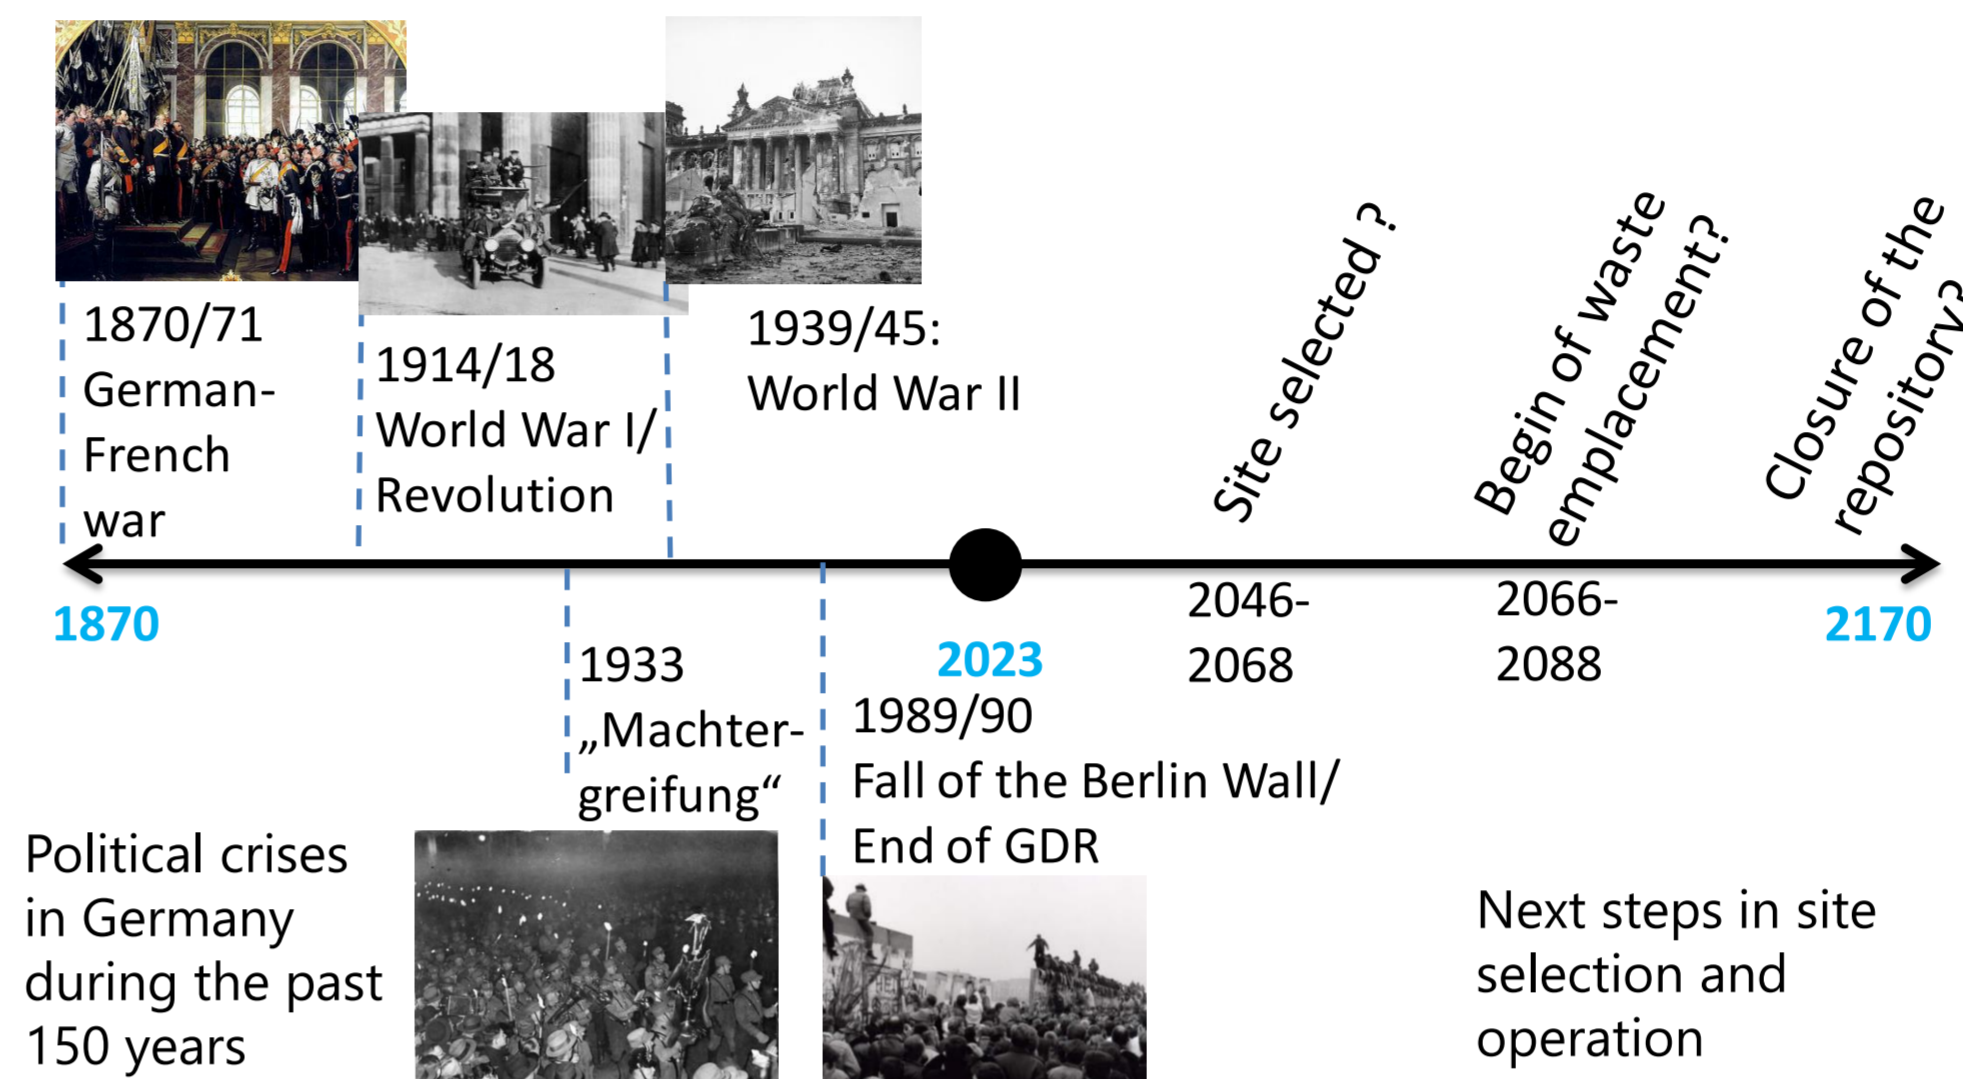

- It may need 150 years until the closure of a new HAW repository
- During the last 150 years, Germany saw three wars and two revolutions

## NOT SO UNLIKELY DISASTERS AHEAD OF US

Natural or human-made disasters are events of significant probability within the timespan of a repository project. Examples are:

- **Natural disasters:** vulcanism, extra-terrestrial risks (e.g. geomagnetic storms), extreme weather events and climatic changes, large scale fires and epidemics
- **Political, economic and demographic disruptions:** wars, revolutions, economic crises, emigration, eviction, genocide
- **Technical or human failure:** organizational deficits, external accidents, negligence, corruption, system failure due to over-complexity

Indirect effects of such events are typically not considered in safety concepts

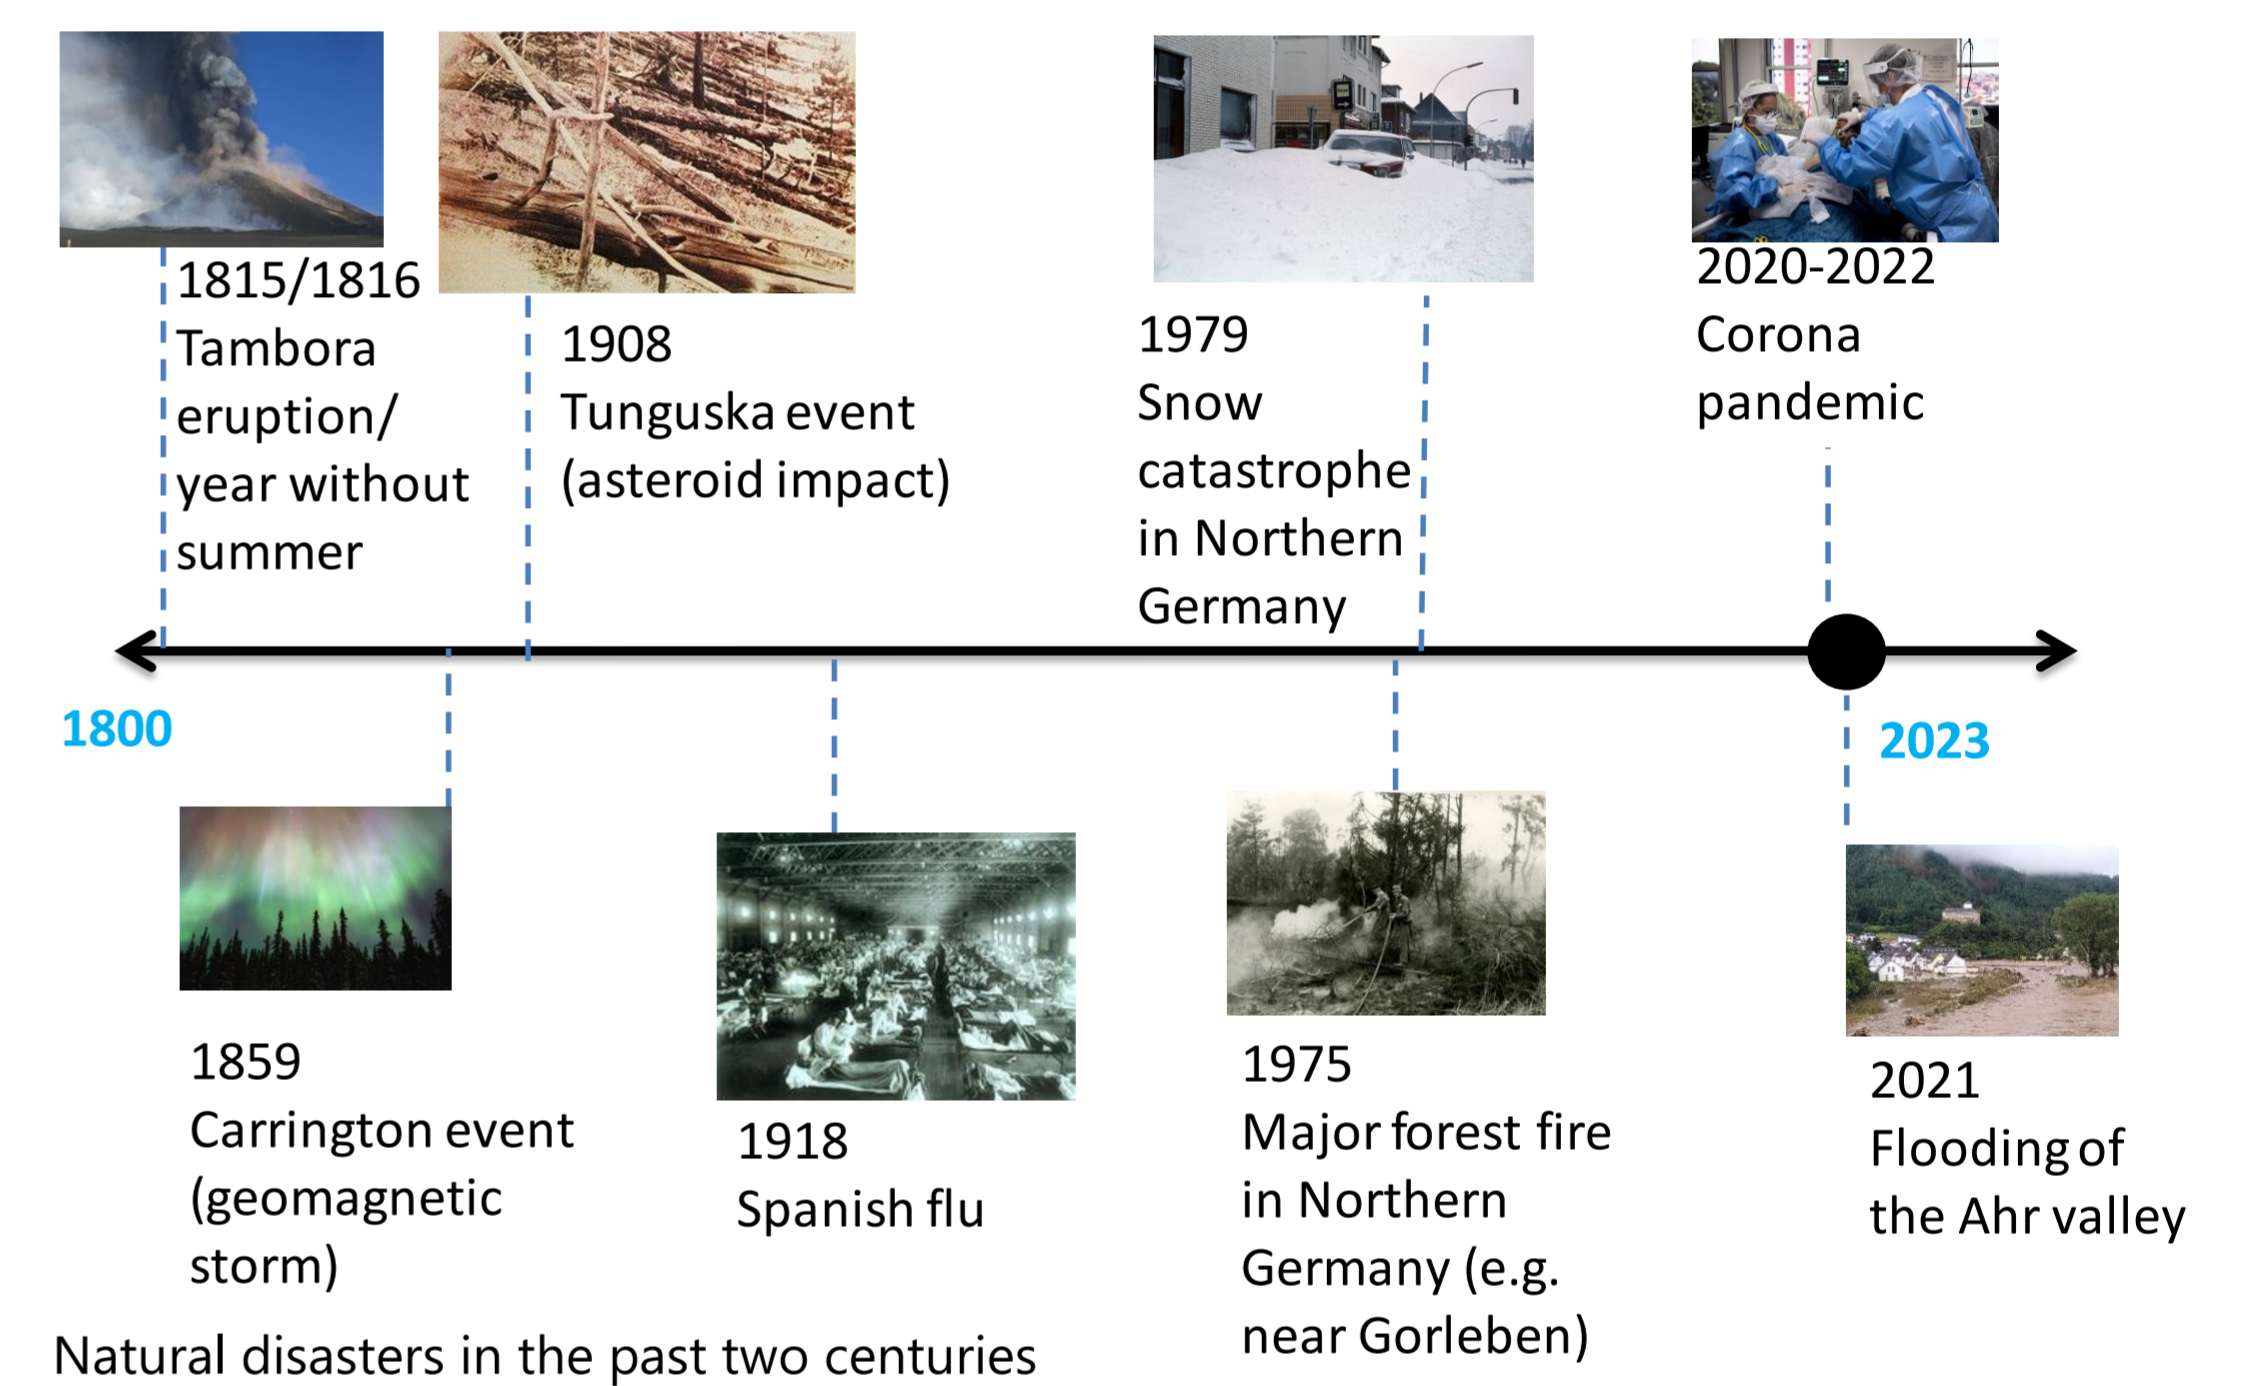

## CHALLENGES FOR THE SAFETY CONCEPT

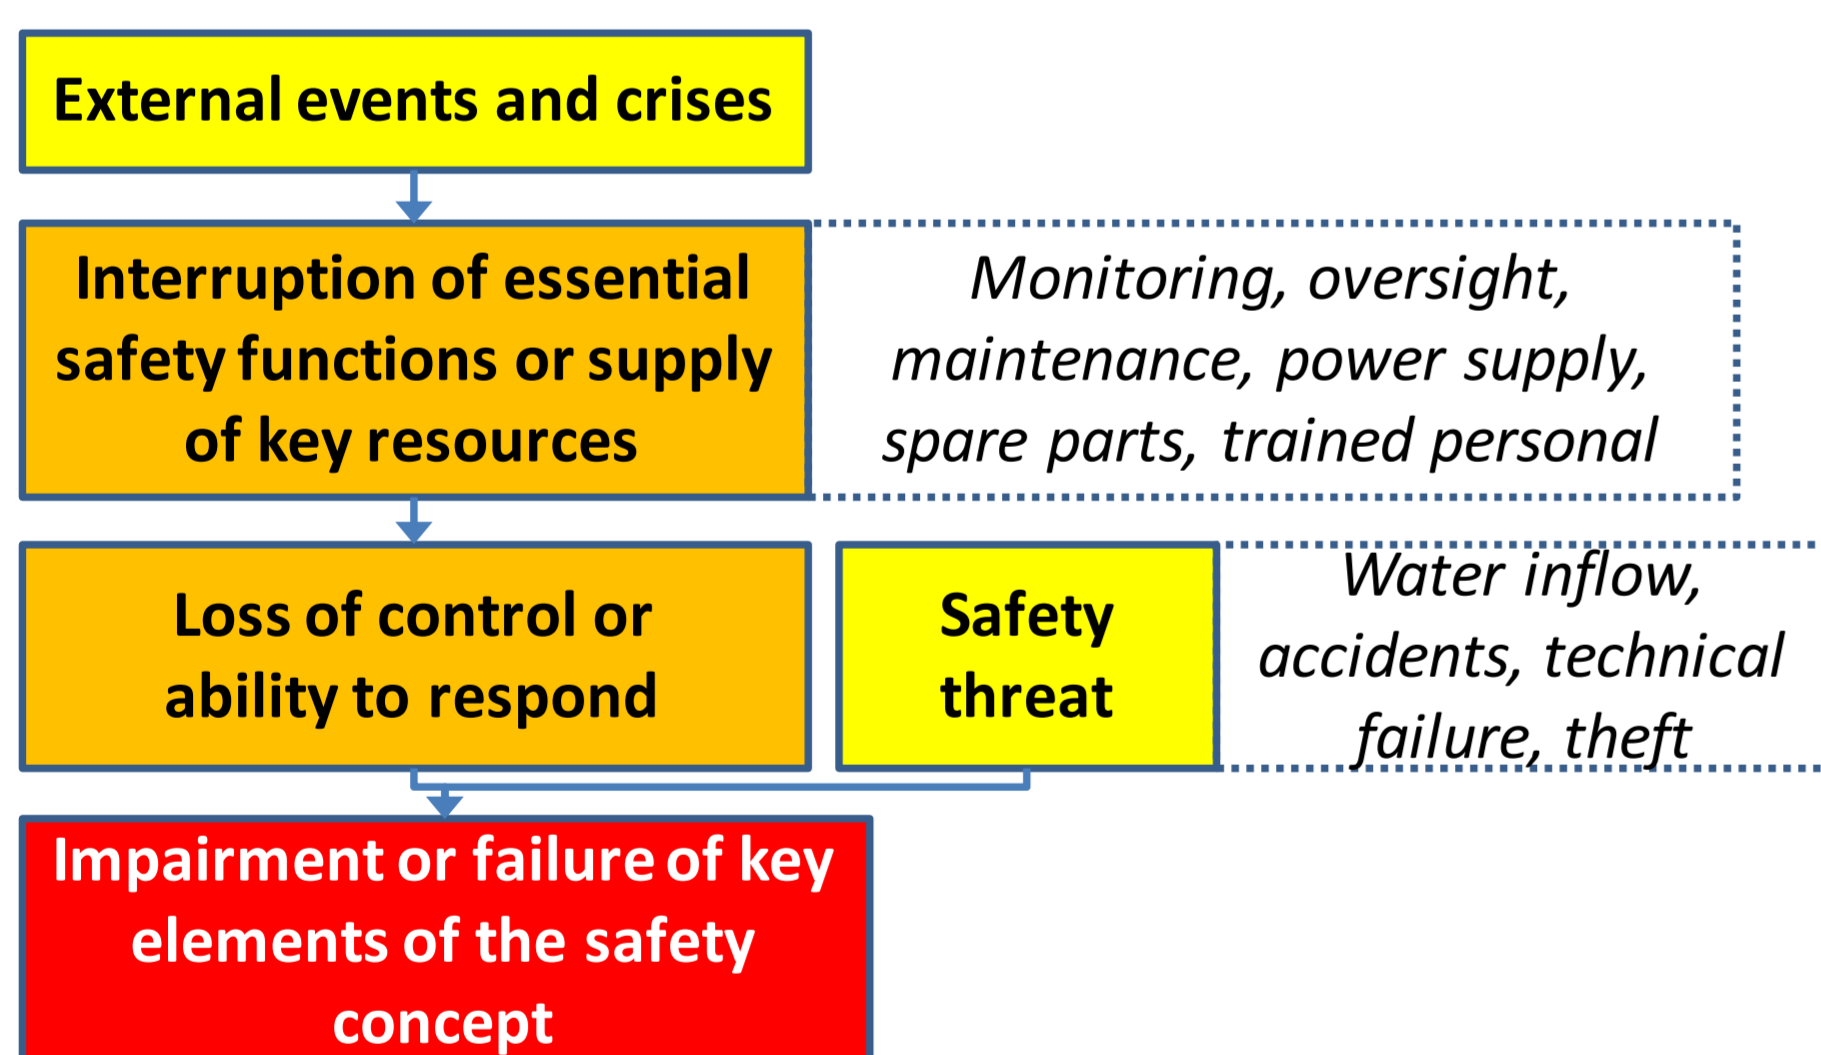

External events may lead to scenarios where key elements of the safety concepts are compromised

## EXAMPLE ON OUR DOORSTEP: UKRAINE

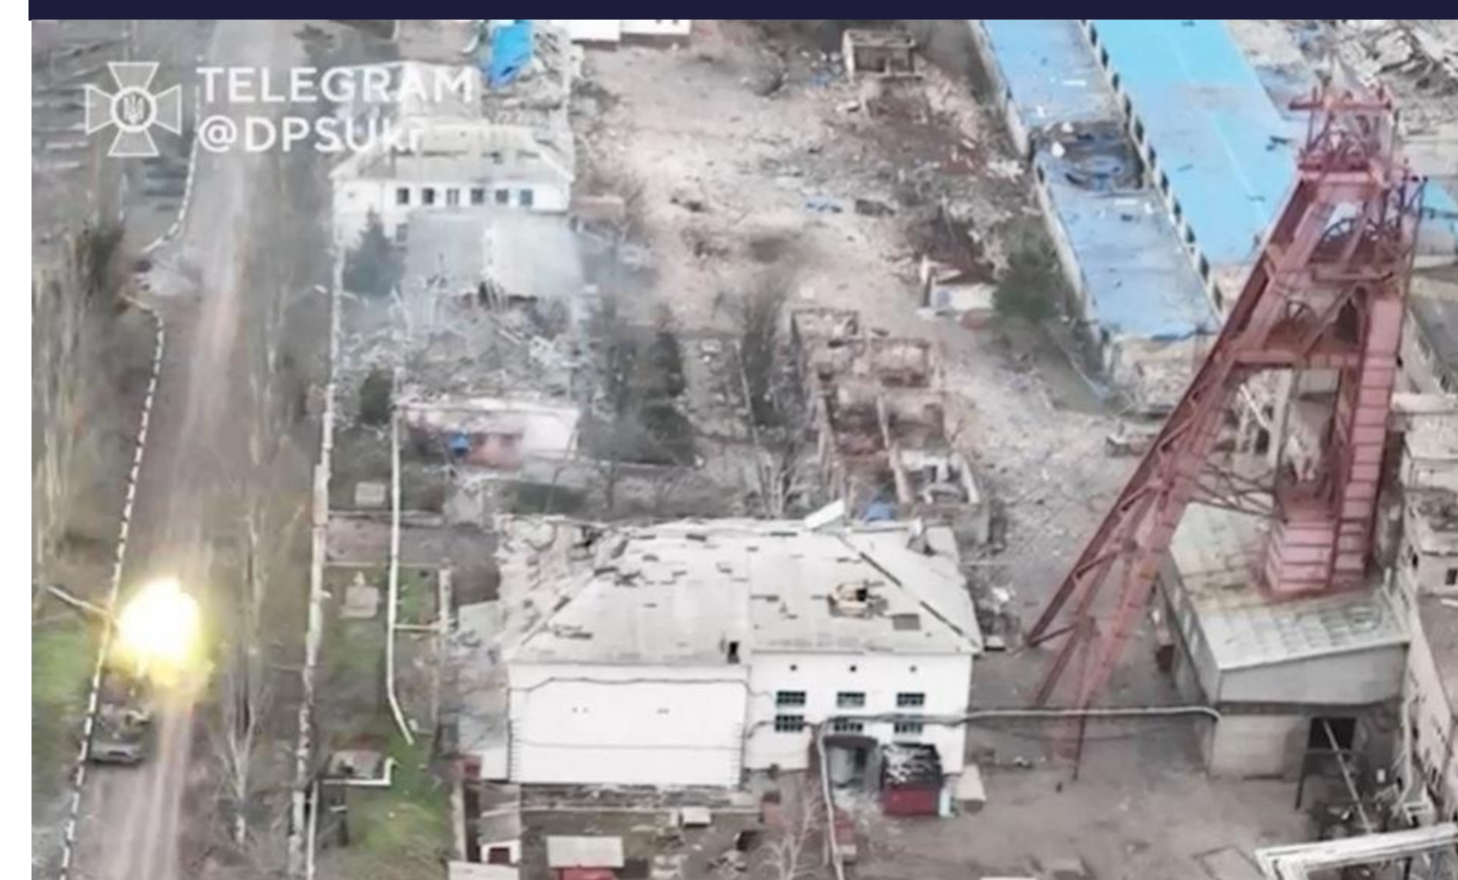

Destruction at the Soledar salt mine (Ukraine, Jan 2023) <sup>[1]</sup>

- Flooding of the Yunkom coal mine (Bunhe, temporarily occupied by Russia) a former nuclear test site <sup>[2]</sup>
- 35+ abandoned mines (2017) <sup>[3]</sup>

## CONCLUSION – PREPARE FOR THE UNEXPECTED

- The possibility of external events with grave consequences for operational and long-term safety must be taken into account
- Already at the stage of concept design, additional safety elements, measures, and processes should be included that
  - Help to manage situations of external stress
  - Provide a minimum level of safety for a certain period of time (weeks, years, decades)
  - Avoid processes that irreversibly impair the safety architecture of the repository

## FURTHER STEPS

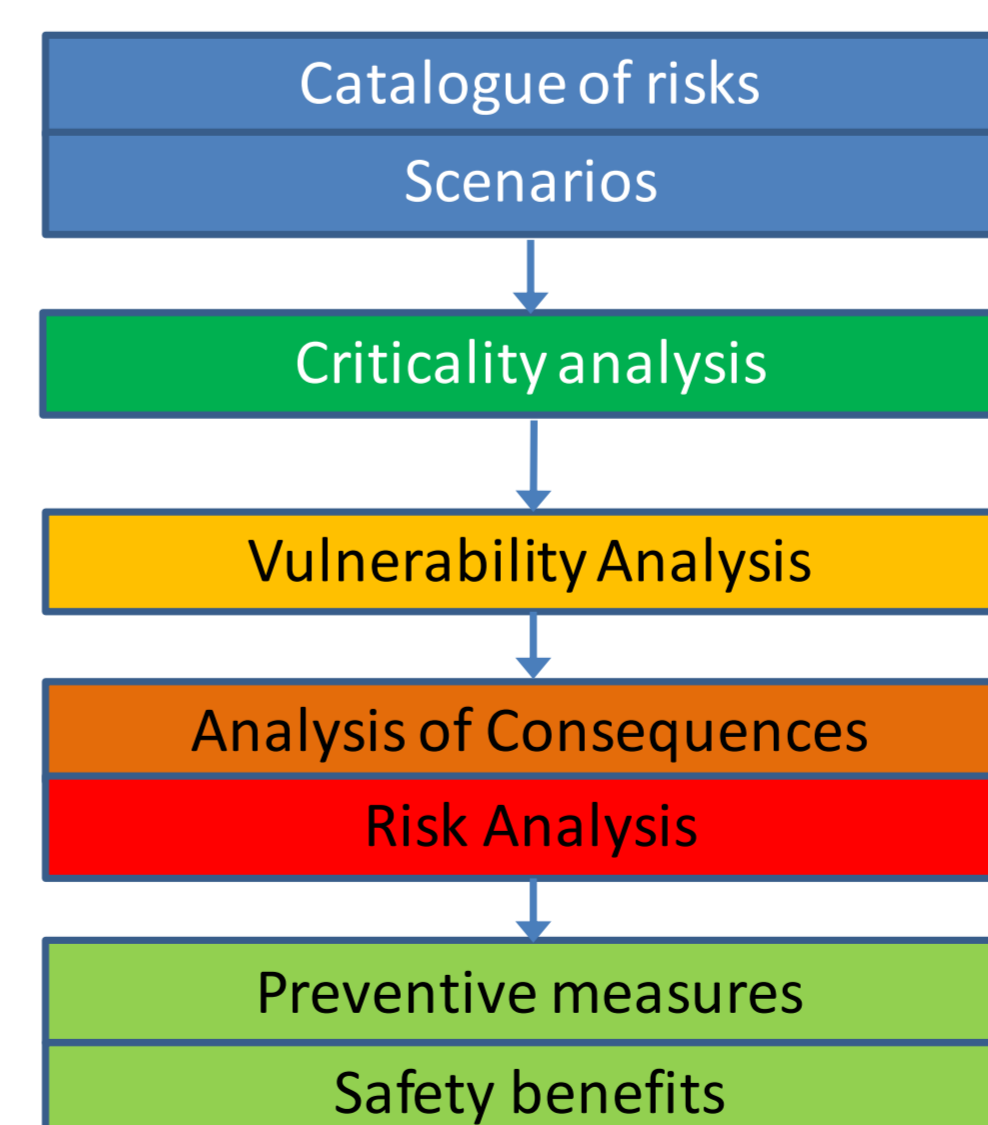

For the development of an enhanced, resilient safety concept some further steps need to be taken, including an analysis of scenarios, criticality, vulnerabilities, consequences and risks.

### Literature

- [1] State Border Guard Service of Ukraine (2023) <https://t.me/DPSUkr/8889>  
 [2] International Centre for Defence and Security (ICDS) (2023) <https://icds.ee/en/the-harsh-reality-of-the-russian-liberation-signs-indicating-that-russia-has-committed-an-environmental-war-crime-in-donbas-since-2018/>  
 [3] OSCE (2017) [https://www.osce.org/files/f/documents/4/3/362566\\_0.pdf](https://www.osce.org/files/f/documents/4/3/362566_0.pdf).

Photo credits (from upper row left side to lower row right side):

| Photo                        | Author                                                                 | License                                                                                                                               |
|------------------------------|------------------------------------------------------------------------|---------------------------------------------------------------------------------------------------------------------------------------|
| German-French war 1870/71    | August von Werner                                                      | <a href="https://commons.wikimedia.org/wiki/Public_domain">https://commons.wikimedia.org/wiki/Public_domain</a>                       |
| Revolution 1914/18           | Bundesarchiv                                                           | <a href="https://creativecommons.org/licenses/by-sa/3.0/de/deed.en">https://creativecommons.org/licenses/by-sa/3.0/de/deed.en</a>     |
| Reichstag 1945               | No 5 Army Film & Photographic Unit. Hewitt (Sgt)                       | <a href="https://en.wikipedia.org/wiki/public_domain">https://en.wikipedia.org/wiki/public_domain</a>                                 |
| Nazi power gras 1933         | Bundesarchiv                                                           | <a href="https://creativecommons.org/licenses/by-sa/3.0/de/deed.en">https://creativecommons.org/licenses/by-sa/3.0/de/deed.en</a>     |
| Fall of the Berlin Wall 1989 | Gabriele Greaney                                                       | <a href="https://creativecommons.org/licenses/by-sa/3.0/de/">https://creativecommons.org/licenses/by-sa/3.0/de/</a>                   |
| Volcano                      | <u>gnuckx</u>                                                          | <a href="https://creativecommons.org/licenses/by/2.0/deed.en">https://creativecommons.org/licenses/by/2.0/deed.en</a>                 |
| Tunguska 1908                | Vokrug Sveta                                                           | <a href="https://en.wikipedia.org/wiki/public_domain">https://en.wikipedia.org/wiki/public_domain</a>                                 |
| Snow 1979                    | -- <u>Nightflyer</u>                                                   | <a href="https://creativecommons.org/licenses/by/4.0/deed.en">https://creativecommons.org/licenses/by/4.0/deed.en</a>                 |
| Corona 2020/22               | Gustavo Basso                                                          | <a href="https://creativecommons.org/licenses/by-sa/4.0">https://creativecommons.org/licenses/by-sa/4.0</a>                           |
| Carrington event 1859        | Studiolit                                                              | <a href="https://creativecommons.org/licenses/by-nc-nd/2.0/legalcode">https://creativecommons.org/licenses/by-nc-nd/2.0/legalcode</a> |
| Spanish Flu 1918 ff.         | Otis Historical Archives,<br>National Museum of Health<br>and Medicine | <a href="https://commons.wikimedia.org/wiki/Public_domain">https://commons.wikimedia.org/wiki/Public_domain</a>                       |
| Forest fire 1975             | Hildegard Markmann                                                     | <a href="http://creativecommons.org/licenses/by-sa/3.0/">http://creativecommons.org/licenses/by-sa/3.0/</a>                           |
| Ahrtal flooding 2021         | Martin Seifert                                                         | <a href="https://creativecommons.org/publicdomain/zero/1.0/deed.en">https://creativecommons.org/publicdomain/zero/1.0/deed.en</a>     |
